# Supplementary material for: Cranial Morphology and Taxonomic Distinctions Among South Asian Treeshrews: Who is the larger treeshrew?
Source: Research Square preprint supplement (doi:10.21203/rs.3.rs-5571628/v1), 2024-12-24
Supplement: Supplementary file 1 [file 0d0e8a053aaf1539e4058c39.xlsx]

## Sheet: Descriptions of measurements
Descriptions of measurements (along with their abbreviations) as outlined by Sargis et al. (2013, 2014, 2017, 2018) and Juman et al. (2021ab, 2022a,b, 2024).
Craniometrics
1) Condylo-premaxillary length (CPL): greatest distance between rostral surface of premaxilla and caudal surface of occipital condyle.
2) Condylo-incisive length (CIL): greatest distance between anterior-most surface of I1 and caudal surface of occipital condyle.
3) Upper toothrow length (UTL): greatest distance between anterior-most surface of I1 and posterior-most surface of M3.
4) Maxillary toothrow length (MTL): greatest distance between anterior-most surface of C1 and posterior-most surface of M3.
5) Palato-premaxillary length (PPL): greatest distance between rostral surface of premaxilla and caudal surface of palatine.
6) Mastoid breadth (MB): greatest distance between lateral apices of mastoid portion of petrosal.
7) Lacrimal breadth (LB): greatest distance between lateral apices of lacrimal tubercles.
8) Least interorbital breadth (LIB): least distance between the orbits.
9) Zygomatic breadth (ZB): greatest distance between lateral surfaces of zygomatic arch.
10) Braincase breadth (BB): greatest breadth of braincase.
11) Lambdoid-premaxillary length (LPL): greatest distance between rostral surface of premaxilla and caudal surface of lambdoid crest.
12) Condylo-nasal length (CNL): greatest distance between rostral surface of nasal and caudal surface of occipital condyle.
13) Postorbital bar-premaxillary length (PBPL): greatest distance between rostral surface of premaxilla and caudal surface of postorbital bar.
14) Lacrimal tubercle-premaxillary length (LTPL): greatest distance between rostral surface of premaxilla and caudal surface of lacrimal tubercle.
15) Lambdoid crest height (LCH): greatest distance from apex (or apices if bilobate) of lambdoid crest to both ventral apices of occipital condyles (i.e., along midline).
16) Mandibular height (MH): greatest distance between coronoid and angular processes of mandible.
17) Mandibular condyle height (MCH): greatest distance between mandibular condyle and angular process of mandible.
18) Mandibular condyle width (MCW): greatest distance between medial and lateral surfaces of mandibular condyle.
19) Mandibular condylo-incisive length (MCIL): greatest distance between anterior-most surface of i1 and caudal surface of mandibular condyle.
20) Lower toothrow length (LTL): greatest distance between anterior-most surface of i1 and posterior-most surface of m3.
Body morphometrics
1) Head and body length (HBL): gretest distance between tip of the snout to the base of the tail
2) Tail length (TL): gretest distance between tip of the tail to its base adjacent to the body
3) Ear length (EL): gretest distance between lower border of the external auditory meatus to the tip of the pinna
4) Hindfoot length (HFL): gretest distance between the extremity of the heel behind the os calcis to the extremity of the longest digit, not including the claws
REFERENCES
Juman, M. M., Woodman, N., Olson, L. E., & Sargis, E. J. 2021a. Ecogeographic variation and taxonomic boundaries in Large Treeshrews (Scandentia, Tupaiidae: Tupaia tana Raffles, 1821) from Southeast Asia. J. Mammal. 102, 1054–1066.
Juman, M. M., Olson, L. E., & Sargis, E. J. 2021b. Skeletal variation and taxonomic boundaries in the Pen-tailed Treeshrew (Scandentia, Ptilocercidae: Ptilocercus lowii Gray, 1848). J. Mamm. Evol. 28, 1193–1203.
Juman, M. M., Millien, V., Olson, L. E., & Sargis, E. J. 2022a. Recent and rapid ecogeographical rule reversals in Northern Treeshrews. Sci. Rep. 12: 19689.
Juman, M. M., Woodman, N., Miller-Murthy, A., Olson, L. E., & Sargis, E. J. 2022b. Taxonomic boundaries in Lesser Treeshrews (Scandentia, Tupaiidae: Tupaia minor Günther, 1876) J. Mammal. 103, 1431-1440.
Juman, M.M., Olson, L.E. & Sargis, E.J. 2024. Craniometric variation and taxonomic boundaries in the Madras Treeshrew (Scandentia, Tupaiidae: Anathana ellioti [Waterhouse, 1850]) from India. J Mammal Evol 31, 4.
Sargis, E. J., Woodman, N., Morningstar, N. C., Reese, A. T., & Olson, L. E. 2013. Morphological distinctiveness of Javan Tupaia hypochrysa (Scandentia, Tupaiidae). J. Mammal. 94, 938–947.
Sargis, E. J., Campbell, K. K., & Olson, L. E. 2014a. Taxonomic boundaries and craniometric variation in the treeshrews (Scandentia, Tupaiidae) from the Palawan faunal region. J. Mamm. Evol. 21, 111–123.
Sargis, E. J., Woodman, N., Morningstar, N. C., Bell, T. N., & Olson, L. E. 2017. Skeletal variation and taxonomic boundaries among mainland and island populations of the common treeshrew (Mammalia: Scandentia: Tupaiidae). Biol. J. Linn. Soc. 120, 286–312.
Sargis, E. J., Millien, V., Woodman, N., & Olson, L. E. 2018. Rule reversal: ecogeographical patterns of body size variation in the common treeshrew (Mammalia, Scandentia). Ecol. Evol. 8, 1634–1645.

## Sheet: Craniometrics
Institute	Reg. Number	Species labelled as	Species recognised as	General locality	Date of collection	Sex	CPL	CIL	UTL	MTL	PPL	MB	LB	LIB	ZB	BB	LPL	CNL	PBPL	LTPL	LCH	MH	MCH	MCW	MCIL	LTL	Locality	Geo coordinates
ZSI	7168	Anathana ellioti ellioti	Anathana ellioti	Tamil Nadu			41.87	41.14	21.87	15.12	23.75	16.43	13.54	13.05	22.4	17.98	43.54	41.25	26.72	16.87	11.51	12.34	6.1	2.53	31.28	20.78	Shevaroy Hills, Tamil Nadu	11°50'50.74" N 78°13'29.38" E
ZSI	7170	Anathana ellioti ellioti	Anathana ellioti	Tamil Nadu			42.13	41.1	22.09	15.28	23.75	16.55	13.8	13.54	22	18.01	43.65	41.48	27.57	17.4	12.05	11.41	6.73	2.45	30.57	20.54	Shevaroy Hills, Tamil Nadu	11°50'50.74" N 78°13'29.38" E
ZSI	7169	Anathana ellioti ellioti	Anathana ellioti	Tamil Nadu			41.52	40.83	21.92	15.25	23.19	16.51	13.77	13.24	21.27	17.62	42.53	41.63	26.8	17.11	11.66	12.57	6.2	2.46	31.23	21.19	Shevaroy Hills, Tamil Nadu	11°50'50.74" N 78°13'29.38" E
ZSI	19692	Anathana ellioti pallida	Anathana ellioti	Bihar	1.05.1880	M	40.6	40.55	21.67	14.84	22.64	15.6	14.13	13.61	20.87	17.14	41.24	39.62	26.11	16.61	11.65	11.84	6.69	2.65	31.08	20.5	Munger, Bihar	25°22'20.54" N 86°27'28.59" E
ZSI	19693	Anathana ellioti pallida	Anathana ellioti	Bihar	1.05.1880	F	40.62	40.23	21.77	14.82	23.24	16.54	13.2	12.94	21.04	16.92	41.89	40.68	26.77	16.64	11.7	11.31	5.51	2.43	30.74	20.77	Munger, Bihar	25°22'20.54" N 86°27'28.59" E
ZSI	19691	Anathana ellioti pallida	Anathana ellioti	Bihar	1.05.1880	M	40.73	40.02	21.67	15.1	23.18	16.76	13.27	13.81	21.6	17.58	42.36	40.54	26.64	17.4	11.9	11.54	6.13	2.47	30.7	20.79	Munger, Bihar	25°22'20.54" N 86°27'28.59" E
ZSI	19526	Anathana ellioti pallida	Anathana ellioti	Odisha	28.5.1972	M	40.92	40.35	20.8	13.55	23.22	15.82	14.09	13.59	22.1	17.39	43.6	40.38	26.82	16.65	11.16	11.77	7.75	2.92	30.9	20.9	Madanpur, Rampur, Kalahandi, Odisha	20°11'44.21" N 83°30'30.06" E
ZSI	19525	Anathana ellioti pallida	Anathana ellioti	Odisha	8.1.1972	M	39.75	39.15	21.22	14.48	22.36	15.75	14.42	12.88	22.05	16.04	41.65	39.89	26.26	16.69	11.43	11.23	6.69	2.37	30.24	19.62	Tikarpara, Dhenkanal, Odisha	20°41'27.23" N 85°52'13.69" E
						Mean	41.0175	40.4213	21.6263	14.805	23.1662	16.245	13.7775	13.3325	21.6663	17.335	42.5575	40.6837	26.7112	16.9213	11.6325	11.7512	6.475	2.535	30.8425	20.6363
						Standard deviation	0.779006	0.652434	0.419692	0.572214	0.480712	0.445838	0.428077	0.350826	0.557134	0.644005	0.947956	0.729441	0.436035	0.337996	0.275357	0.485899	0.660043	0.175987	0.35241	0.462754
						Minimum	39.75	39.15	20.8	13.55	22.36	15.6	13.2	12.88	20.87	16.04	41.24	39.62	26.11	16.61	11.16	11.23	5.51	2.37	30.24	19.62
						Maximum	42.13	41.14	22.09	15.28	23.75	16.76	14.42	13.81	22.4	18.01	43.65	41.63	27.57	17.4	12.05	12.57	7.75	2.92	31.28	21.19
ZSI	18864	Tupaia belangeri assamensis	Tupaia belangeri	Tripura	13.12.1972	M	46.11	45.38	24.95	17.16	25.99	17.31	15.86	13.75	25.06	18.8	48.88	45.9	31.51	21.51	11.35	12.4	8.04	3.08	35.21	23.99	Kashipur, Tripura	23°50'44.37" N 91°19'18.76" E
ZSI	19684	Tupaia belangeri assamensis	Tupaia belangeri	Assam	28.01.1957	M	47.24	46.57	25.76	18.05	27.77	17.4	17.67	13.57	25.44	19.32	49.65	46.02	31.96	22.17	11.68	13.62	8.65	3.24	36.8	24.46	Garo Hills, Meghalaya	25°30'00.00" N 90°20'00.00" E
ZSI	16634	Tupaia belangeri assamensis	Tupaia belangeri	Meghalaya	10.04.1921	M	45.39	45	24.9	17.27	26.76	17.52	18.07	13.94	24.38	19.59	48.4	43.82	31.48	26.56	10.9	13.97	8.84	3.38	35.05	23.41	Dening, Mishmi hills, Arunachal Pradesh	28°15'00.00" N 96°00'00.00" E
ZSI	16627	Tupaia belangeri assamensis	Tupaia belangeri	Meghalaya	26.3.1970	M	46.48	45.48	24.6	16.99	27.31	18.3	17.45	14.87	25.08	19.22	48.88	45.07	32.27	21.69	11.87	13.85	9.01	3.75	35.97	23.29	Garo Hills, Meghalaya	25°30'00.00" N 90°20'00.00" E
ZSI	R/14	Tupaia belangeri assamensis	Tupaia belangeri	Manipur	14.11.1945	M	47.28	47.1	25.41	17.62	27.2	17.57	17.15	13.97	25.8	19.7	50.29	46.2	32.17	24.06	11.81	13.98	6.76	3.06	36.19	23.94	Tamu road, Imphal, Manipur	24°56'41.77" N 94°14'00.12" E
ZSI	23846	Tupaia belangeri assamensis	Tupaia belangeri	Mizoram	24.10.1991	F	45.03	44.26	24.34	16.74	25.82	17.66	16.81	12.91	24.8	19.5	48.12	43.5	31.18	21.1	11.42	12.62	8.18	3.17	34.66	23.06	Teirei, Dampa WLS, Aizwal, Mizoram	23°30'12.36" N 92°25'04.70" E
ZSI	11136	Tupaia belangeri assamensis	Tupaia belangeri	Manipur	27.11.1945	M	44.21	43.33	23.02	16.76	24.9	16.99	15.49	12.24	23.89	19.46	47.06	43.39	29.2	19.1	11.45	11.88	7.3	2.6	33.55	22.19	Dimapur road, Imphal, Manipur	24°55'09.47" N 93°49'11.24" E
ZSI	11135	Tupaia belangeri assamensis	Tupaia belangeri	Manipur	14.11.1945	M	47.3	46.79	25.42	17.5	26.98	17.7	18.15	13.78	25.22	19.6	49.36	45.89	32.33	21.63	11.88	14	8.79	3.04	36.62	23.83	Dimapur road, Imphal, Manipur	24°55'09.47" N 93°49'11.24" E
ZSI	17989	Tupaia belangeri assamensis	Tupaia belangeri	Meghalaya	1857		43.15	42.61	23.68	16.22	25.44	17.43	16.94	13.72	25.19	18.89	46.76	42.33	30.62	20.34	11.1	12.19	6.53	3.68	32.85	21.76	Cherrapunji, Meghalaya	25°16'16.46" N 91°44'34.22" E
ZSI	16635	Tupaia belangeri belangeri	Tupaia belangeri	Myanmar	20.4.1916	M	47.39	46.93	26.48	18.23	28.39	17.75	18.36	13.98	25.71	18.91	49	43.76	33.49	22.38	11.55	14.79	7.02	3.61	37.25	24.88	N. Zamayi, 8 km north of pegn, L. Burma, 600 ft.	18°19'52.61" N 96°04'04.51" E
ZSI	16636	Tupaia belangeri belangeri	Tupaia belangeri	Myanmar	19.6.1927	F	45.48	45.3	25.13	16.99	26.63	18.18	16.32	13.67	26.53	19.15	48.33	44.58	30.96	22.3	11.75	14.14	8.78	3.5	36.08	23.88	Toungoo (w), Lower Burma	18°56'23.41" N 96°26'03.70" E
ZSI	16637	Tupaia belangeri belangeri	Tupaia belangeri	Myanmar	7.1.1928	F	46.54	46.06	25.48	17.71	27.09	17.84	17.09	14.13	25.04	19.27	49.4	45.88	31.09	26.96	11.73	13.71	7.16	3.36	36.47	23.89	Toungoo (w), Lower Burma	18°56'23.41" N 96°26'03.70" E
ZSI	16631	Tupaia belangeri brunetta	Tupaia belangeri	Myanmar	29.10.1921	F	46.39	46.13	25.59	17.98	26.79	17.82	17.42	13.39	24.46	18.95	47.54	45.41	32.38	24.86	11.08	13.27	7.89	3.26	36.31	24.75	Tavoy Island, Burma	13°05'55.34" N 98°16'33.61" E
ZSI	16630	Tupaia belangeri brunetta	Tupaia belangeri	Myanmar	2.10.1921	M	44.28	43.61	24.98	17.28	26.8	16.93	17.89	13.41	23.56	18.77	47.4	42.67	31.73	24.25	11.06	12.06	7.42	2.78	35.07	23.58	King Island, Mergui, Burma	12°30'50.50" N 98°22'28.46" E
ZSI	16638	Tupaia belangeri clarissa	Tupaia belangeri	Myanmar	19.07.1913	M	46.92	46.44	26.79	18.09	28.56	17.16	17.96	13.52	24.06	18.12	50.22	45.04	33.92	23.41	12.36	12.76	6.15	2.98	37.22	25.47	Tenasserim village, Tenasserim	12°04'27.24" N 99°04'41.09" E
ZSI	16640	Tupaia belangeri clarissa	Tupaia belangeri	Myanmar	30.4.1914	M	45.83	45.33	25.76	17.72	27.3	17.16	17.94	13.7	26.1	19.56	49.28	44.37	32.94	22.04	12.12	12.71	8.14	3.22	35.73	23.91	Tenasserim village, Tenasserim	12°04'27.24" N 99°04'41.09" E
ZSI	16625	Tupaia belangeri lepcha	Tupaia belangeri	West Bengal	1.4.1916	M	45.47	45.11	24.92	17.02	26.42	17.81	17.1	13.61	25.95	19.03	48.33	44.54	31.2	23.77	11.62	14.26	8.79	3.04	35.64	23.18	Hasimara, West Bengal	26°43'51.14" N 89°21'02.31" E
ZSI	16624	Tupaia belangeri lepcha	Tupaia belangeri	West Bengal	7.1.1916	F	44.22	43.63	24.45	17.2	25.98	17.43	16.32	12.75	22.23	19.03	46.8	43.08	30.57	24.36	11.73	12.02	7.83	3.12	33.93	21.81	Hasimara, West Bengal	26°43'51.14" N 89°21'02.31" E
ZSI	16626	Tupaia belangeri lepcha	Tupaia belangeri	West Bengal	21.6.1916	M	43.72	43.63	24.14	16.48	25.59	16.33	16.15	13.07	23.55	17.91	46.32	43.22	30.22	23.15	11.38	12.64	7.97	3.11	34.42	22.98	Nimbong, West Bengal	26°58'20.44" N 88°35'25.25" E
ZSI	26650	Tupaia belangeri lepcha	Tupaia belangeri	West Bengal			46.79	46.38	25.9	17.72	27.82	18.23	18.43	14.67	24.95	20.07	49.86	45.5	32.53	22.88	11.51	13.53	8.71	3.41	36.43	24.29	no history
ZSI	16623	Tupaia belangeri lepcha	Tupaia belangeri	West Bengal	20.3.1915	F	42.98	42.58	23.57	16.62	24.89	16.81	16.13	12.82	23.18	18.47	45.51	41.99	29.38	21.84	11.23	12.65	8.21	2.88	33.53	22.42	Sikkim	27°21'05.91" N 88°19'26.15" E
						Mean	45.6286	45.1262	25.0129	17.3024	26.6871	17.4919	17.1762	13.5938	24.7705	19.1105	48.3519	44.3886	31.5776	22.8743	11.5514	13.1929	7.91286	3.20333	35.4752	23.57
						Standard deviation	1.40931	1.43221	0.939703	0.565021	1.02864	0.489823	0.87176	0.61417	1.06716	0.522919	1.33413	1.31264	1.21055	1.90205	0.365531	0.861076	0.839715	0.290368	1.26559	0.979515
						Minimum	42.98	42.58	23.02	16.22	24.89	16.33	15.49	12.24	22.23	17.91	45.51	41.99	29.2	19.1	10.9	11.88	6.15	2.6	32.85	21.76
						Maximum	47.39	47.1	26.79	18.23	28.56	18.3	18.43	14.87	26.53	20.07	50.29	46.2	33.92	26.96	12.36	14.79	9.01	3.75	37.25	25.47
ZSI	19688	Tupaia nicobarica nicobarica	Tupaia nicobarica	Andaman & Nicobar Island	15.12.1875	M	49.44	49.16	27.85	18.72	29.18	18.31	17.72	16.02	29	20.35	53.48	47.72	32.8	24.57	12.16	15.64	10.58	3.84	39.55	25.72	Great Nicobar, Andaman & Nicobar Islands	7°02'04.66" N 93°47'02.94" E
ZSI	20768	Tupaia nicobarica nicobarica	Tupaia nicobarica	Andaman & Nicobar Island	30.03.1977	M	50	49.52	27.54	18.87	30.43	18.83	18.7	17.14	28.75	19.99	54.17	49.3	33.67	25.72	12.57	15.94	10.65	4.02	39.15	25.89	Laksman Bay, 3 km NW of Campbell Bay, Great Nicobar, Andaman & Nicobar Islands	7°00'27.23" N 93°54'17.23" E
ZSI	21308	Tupaia nicobarica nicobarica	Tupaia nicobarica	Andaman & Nicobar Island	30.07.1984	F	50.28	49.65	28.06	19.51	29.44	18.33	18.88	16.77	29.41	20.76	54.02	49.19	33.36	26.39	12.83	16.31	10.63	4.24	39.73	26.28	Near Galathea, 40 km P on N.S. Road, Great Nicobar, Andaman & Nicobar Islands	6°50'21.18" N 93°50'54.13" E
ZSI	GNM 77/4	Tupaia nicobarica nicobarica	Tupaia nicobarica	Andaman & Nicobar Island	29.07.1977	F	49.28	48.61	27.3	18.69	29.8	17.89	18.66	17.19	28.56	20	53.12	47.56	32.79	25.39	12.11	15.57	10.05	4.18	39.1	25.33	Magar Nullah, Great Nicobar, Andaman & Nicobar Islands	7°02'04.66" N 93°47'02.94" E
ZSI	21304	Tupaia nicobarica nicobarica	Tupaia nicobarica	Andaman & Nicobar Island	4.07.1984	M	50.51	50.09	28.69	19.23	30.13	17.8	18.89	17.18	28.19	19.87	54.11	48.15	34.04	26.59	12.39	16.5	10.14	3.96	40.31	26.08	South Bay, 45 km P. on NS Road, Great Nicobar, Andaman & Nicobar Islands	6°48'37.15" N 93°53'09.77" E
ZSI	20764	Tupaia nicobarica nicobarica	Tupaia nicobarica	Andaman & Nicobar Island	24.04.1975	F	50.44	50.03	28.92	19.62	30.62	18.18	18.37	16.18	28.56	20.33	53.77	48.75	34.01	25.72	12.93	15.29	9.6	4.08	40.33	27.16	Campbell Bay, Great Nicobar, Andaman & Nicobar Islands	7°00'27.23" N 93°54'17.23" E
ZSI	20765	Tupaia nicobarica nicobarica	Tupaia nicobarica	Andaman & Nicobar Island	29.04.1975	M	50.46	49.77	28.3	19.07	30.1	18.58	18.09	16.01	28.51	20.82	54.67	48.57	33.56	25.96	12.08	15.81	9.62	4.02	40.06	26.41	Campbell Bay, Great Nicobar, Andaman & Nicobar Islands	7°00'27.23" N 93°54'17.23" E
ZSI	20767	Tupaia nicobarica nicobarica	Tupaia nicobarica	Andaman & Nicobar Island	29.03.1977	M	50.85	50.26	29.45	19.67	30.21	17.61	18.92	16.71	28.33	20.34	54.97	48.59	35.26	25.9	12.37	15.54	9.52	3.99	40.23	26.99	Magar Nullah, Great Nicobar, Andaman & Nicobar Islands	7°02'04.66" N 93°47'02.94" E
ZSI	20766	Tupaia nicobarica nicobarica	Tupaia nicobarica	Andaman & Nicobar Island	30.04.1975	F	49.01	48.41	27.4	18.42	29.9	18.44	19.42	16.69	28.74	20.37	52.72	46.97	33.46	24.89	12.66	16.33	10.31	4.15	39.41	25.86	14 km. South of Campbell Bay, Great Nicobar, Andaman & Nicobar Islands	7°00'27.23" N 93°54'17.23" E
ZSI	21307	Tupaia nicobarica nicobarica	Tupaia nicobarica	Andaman & Nicobar Island	30.07.1984	M	49.8	49.24	28.24	19.27	29.22	18.61	18.17	15.87	27.69	19.94	54.12	48.14	33.49	25.28	12.43	15.97	10.69	4.16	40.09	26.61	Near Galathea, 40 km P on N.S. Road, Great Nicobar, Andaman & Nicobar Islands	6°50'21.18" N 93°50'54.13" E
ZSI	21303	Tupaia nicobarica nicobarica	Tupaia nicobarica	Andaman & Nicobar Island	30.06.1984	M	49.05	48.63	27.81	19.09	28.99	17.73	17.39	15.56	27.31	19.19	52.71	46.49	31.94	24.64	11.8	15.05	9.77	3.63	40.01	26.03	South Bay, 45 km P. on NS Road, Great Nicobar, Andaman & Nicobar Islands	6°48'37.15" N 93°53'09.77" E
ZSI	21306	Tupaia nicobarica nicobarica	Tupaia nicobarica	Andaman & Nicobar Island	17.07.1984	M	48.78	48.45	27.39	19.08	28.46	18.05	18.06	16.43	27.8	19.72	52.4	46.97	32.21	24.74	11.84	15.92	10.29	3.77	39.17	25.11	South Bay, 45 km P. on NS Road, Great Nicobar, Andaman & Nicobar Islands	6°48'37.15" N 93°53'09.77" E
ZSI	21299	Tupaia nicobarica nicobarica	Tupaia nicobarica	Andaman & Nicobar Island	14.07.1984	M	50.37	49.65	28.24	19.34	29.74	18.47	19.09	17.44	29.06	20.69	54.49	48.69	33.94	26.31	12.3	15.69	9.94	3.96	39.14	25.94	South Bay, 45 km P. on NS Road, Great Nicobar, Andaman & Nicobar Islands	6°48'37.15" N 93°53'09.77" E
ZSI	6535	Tupaia nicobarica nicobarica	Tupaia nicobarica	Andaman & Nicobar Island		M	49.16	49.14	27.84	19.11	28.97	18.83	16.41	15.51	25.54	19.72	53.12	47.75	32.37	24.94	11.83	15.69	8.63	3.61	39.83	26.02	Great Nicobar Island, Andaman & Nicobar Islands	7°02'04.66" N 93°47'02.94" E
						Mean	49.8164	49.3293	28.0736	19.1207	29.6564	18.2614	18.3407	16.4786	28.2464	20.1493	53.705	48.06	33.35	25.5029	12.3071	15.8036	10.03	3.97214	39.7221	26.1021
						Standard deviation	0.683876	0.624456	0.624864	0.360565	0.629549	0.398166	0.788079	0.633475	0.963476	0.458383	0.794304	0.856909	0.87488	0.681225	0.361204	0.400646	0.574443	0.19714	0.464281	0.565729
						Minimum	48.78	48.41	27.3	18.42	28.46	17.61	16.41	15.51	25.54	19.19	52.4	46.49	31.94	24.57	11.8	15.05	8.63	3.61	39.1	25.11
						Maximum	50.85	50.26	29.45	19.67	30.62	18.83	19.42	17.44	29.41	20.82	54.97	49.3	35.26	26.59	12.93	16.5	10.69	4.24	40.33	27.16

## Sheet: Body morphometrics
Institute	Reg. No.	Species labeled as	Species recognised as	General locality	Date of collection	Sex	HBL	TL	EL	HFL	Locality	Geo coordinates
ZSI	7168	Anathana ellioti ellioti	Anathana ellioti	Tamil Nadu			165	185	17.14	37.29	Shevaroy Hills, Tamil Nadu	11°50'50.74" N 78°13'29.38" E
ZSI	7170	Anathana ellioti ellioti	Anathana ellioti	Tamil Nadu			162	190	16.14	40.56	Shevaroy Hills, Tamil Nadu	11°50'50.74" N 78°13'29.38" E
ZSI	7169	Anathana ellioti ellioti	Anathana ellioti	Tamil Nadu			152	165	17.5	39.12	Shevaroy Hills, Tamil Nadu	11°50'50.74" N 78°13'29.38" E
ZSI	19692	Anathana ellioti pallida	Anathana ellioti	Bihar	1.05.1880	M	165	183	14	38	Munger, Bihar	25°22'20.54" N 86°27'28.59" E
ZSI	19693	Anathana ellioti pallida	Anathana ellioti	Bihar	1.05.1880	F	180	190	15	40	Munger, Bihar	25°22'20.54" N 86°27'28.59" E
ZSI	19691	Anathana ellioti pallida	Anathana ellioti	Bihar	1.05.1880	M	182	190	16	39	Munger, Bihar	25°22'20.54" N 86°27'28.59" E
ZSI	19526	Anathana ellioti pallida	Anathana ellioti	Odisha	28.5.1972	M	165	180	17.4	40.6	Madanpur, Rampur, Kalahandi, Odisha	20°11'44.21" N 83°30'30.06" E
ZSI	19525	Anathana ellioti pallida	Anathana ellioti	Odisha	8.1.1972	M	159	170	16	41	Tikarpara, Dhenkanal, Odisha	20°41'27.23" N 85°52'13.69" E
ZSI	18864	Tupaia belangeri assammensis	Tupaia belangeri belangeri	Tripura	13.12.1972	M	170	162	16	41	Kashipur, Tripura	23°50'44.37" N 91°19'18.76" E
ZSI	19684	Tupaia belangeri assammensis	Tupaia belangeri belangeri	Assam	28.01.1957	M	189	160	16	41	Garo Hills, Meghalaya	25°30'00.00" N 90°20'00.00" E
ZSI	16634	Tupaia belangeri assammensis	Tupaia belangeri belangeri	Meghalaya	10.04.1921	M	183	173	17	34	Dening, Mishmi hills, Arunachal Pradesh	28°15'00.00" N 96°00'00.00" E
ZSI	16627	Tupaia belangeri assammensis	Tupaia belangeri belangeri	Meghalaya	26.3.1970	M	188	175	17	41	Garo Hills, Meghalaya	25°30'00.00" N 90°20'00.00" E
ZSI	23846	Tupaia belangeri assammensis	Tupaia belangeri belangeri	Mizoram	24.10.1991	F	175	156	13	42	Teirei, Dampa WLS, Aizwal, Mizoram	23°30'12.36" N 92°25'04.70" E
ZSI	11136	Tupaia belangeri assammensis	Tupaia belangeri belangeri	Manipur	27.11.1945	M	180.2	170.5	15	43	Dimapur road, Imphal, Manipur	24°55'09.47" N 93°49'11.24" E
ZSI	16635	Tupaia belangeri belangeri	Tupaia belangeri belangeri	Myanmar	20.4.1916	M	186	181	15	45	N. Zamayi, 8 km north of pegn, L. Burma, 600 ft.	18°19'52.61" N 96°04'04.51" E
ZSI	16636	Tupaia belangeri belangeri	Tupaia belangeri belangeri	Myanmar	19.6.1927	F	170	165	15	41	Toungoo (w), Lower Burma	18°56'23.41" N 96°26'03.70" E
ZSI	16637	Tupaia belangeri belangeri	Tupaia belangeri belangeri	Myanmar	7.1.1928	M	178	171	18	40	Toungoo (w), Lower Burma	18°56'23.41" N 96°26'03.70" E
ZSI	16631	Tupaia belangeri brunetta	Tupaia belangeri belangeri	Myanmar	29.10.1921	F	178	160	16	30	Tavoy Island, Burma	13°05'55.34" N 98°16'33.61" E
ZSI	16630	Tupaia belangeri brunetta	Tupaia belangeri belangeri	Myanmar	2.10.1921	M	176	144	15	39	King Island, Mergui, Burma	12°30'50.50" N 98°22'28.46" E
ZSI	16638	Tupaia belangeri clarissa	Tupaia belangeri belangeri	Myanmar	19.07.1913	M	181	161	16	45	Tenasserim village, Tenasserim	12°04'27.24" N 99°04'41.09" E
ZSI	16640	Tupaia belangeri clarissa	Tupaia belangeri belangeri	Myanmar	30.4.1914	M	180	167	16	43	Tenasserim village, Tenasserim	12°04'27.24" N 99°04'41.09" E
ZSI	16625	Tupaia belangeri lepcha	Tupaia belangeri belangeri	West Bengal	1.4.1916	M	158	175	17	42	Hasimara, West Bengal	26°43'51.14" N 89°21'02.31" E
ZSI	16624	Tupaia belangeri lepcha	Tupaia belangeri belangeri	West Bengal	7.1.1916	F	150	162	15	39	Hasimara, West Bengal	26°43'51.14" N 89°21'02.31" E
ZSI	16626	Tupaia belangeri lepcha	Tupaia belangeri belangeri	West Bengal	21.6.1916	M	148	160	15	40	Nimbong, West Bengal	26°58'20.44" N 88°35'25.25" E
ZSI	26650	Tupaia belangeri lepcha	Tupaia belangeri belangeri	West Bengal			160	172	15	44	no history
ZSI	16623	Tupaia belangeri lepcha	Tupaia belangeri belangeri	West Bengal	20.3.1915	F	154	172	16	41	Sikkim	27°21'05.91" N 88°19'26.15" E
ZSI	20768	Tupaia nicobarica nicobarica	Tupaia nicobarica nicobarica	Andaman & Nicobar Island		M	189.5	228	17.5	44.5	Great Nicobar Island, Andaman & Nicobar Islands	7°02'04.66" N 93°47'02.94" E
ZSI	21308	Tupaia nicobarica nicobarica	Tupaia nicobarica nicobarica	Andaman & Nicobar Island	30.07.1984	F	200.5	210.5	18	46	Near Galathea, 40 km P on N.S. Road, Great Nicobar, Andaman & Nicobar Islands	6°50'21.18" N 93°50'54.13" E
ZSI	GNM 77/4	Tupaia nicobarica nicobarica	Tupaia nicobarica nicobarica	Andaman & Nicobar Island	29.07.1977	F	186.2	237.5	18	43.5	Magar Nullah, Great Nicobar, Andaman & Nicobar Islands	7°02'04.66" N 93°47'02.94" E	180 GM
ZSI	21304	Tupaia nicobarica nicobarica	Tupaia nicobarica nicobarica	Andaman & Nicobar Island	4.07.1984	M	182	228	19	47	South Bay, 45 km P. on NS Road, Great Nicobar, Andaman & Nicobar Islands	6°48'37.15" N 93°53'09.77" E
ZSI	20764	Tupaia nicobarica nicobarica	Tupaia nicobarica nicobarica	Andaman & Nicobar Island	24.04.1975	F	200	215	16	43.5	Campbell Bay, Great Nicobar, Andaman & Nicobar Islands	7°00'27.23" N 93°54'17.23" E	148
ZSI	20765	Tupaia nicobarica nicobarica	Tupaia nicobarica nicobarica	Andaman & Nicobar Island	29.04.1975	M	224	228	17.5	44	Campbell Bay, Great Nicobar, Andaman & Nicobar Islands	7°00'27.23" N 93°54'17.23" E
ZSI	20767	Tupaia nicobarica nicobarica	Tupaia nicobarica nicobarica	Andaman & Nicobar Island	29.03.1977	M	183.5	210.5	17.5	46.4	Magar Nullah, Great Nicobar, Andaman & Nicobar Islands	7°02'04.66" N 93°47'02.94" E	190
ZSI	20766	Tupaia nicobarica nicobarica	Tupaia nicobarica nicobarica	Andaman & Nicobar Island	30.04.1975	F	195	213	17.7	43	14 km. South of Campbell Bay, Great Nicobar, Andaman & Nicobar Islands	7°00'27.23" N 93°54'17.23" E
ZSI	21307	Tupaia nicobarica nicobarica	Tupaia nicobarica nicobarica	Andaman & Nicobar Island	30.07.1984	M	180	230	18	46	Near Galathea, 40 km P on N.S. Road, Great Nicobar, Andaman & Nicobar Islands	6°50'21.18" N 93°50'54.13" E
ZSI	21303	Tupaia nicobarica nicobarica	Tupaia nicobarica nicobarica	Andaman & Nicobar Island	30.06.1984	F	180	225	17.5	45	South Bay, 45 km P. on NS Road, Great Nicobar, Andaman & Nicobar Islands	6°48'37.15" N 93°53'09.77" E
ZSI	21306	Tupaia nicobarica nicobarica	Tupaia nicobarica nicobarica	Andaman & Nicobar Island	17.07.1984	M	180	235	19	47	South Bay, 45 km P. on NS Road, Great Nicobar, Andaman & Nicobar Islands	6°48'37.15" N 93°53'09.77" E
ZSI	21299	Tupaia nicobarica nicobarica	Tupaia nicobarica nicobarica	Andaman & Nicobar Island	14.07.1984	F	210.2	230	12.6	42.8	South Bay, 45 km P. on NS Road, Great Nicobar, Andaman & Nicobar Islands	6°48'37.15" N 93°53'09.77" E
ZSI	6535	Tupaia nicobarica nicobarica	Tupaia nicobarica nicobarica	Andaman & Nicobar Island		M	200	240	17	44.5	Great Nicobar Island, Andaman & Nicobar Islands	7°02'04.66" N 93°47'02.94" E
ZSI	21305	Tupaia nicobarica nicobarica	Tupaia nicobarica nicobarica	Andaman & Nicobar Island		M	195	235	18	47	Great Nicobar Island, Andaman & Nicobar Islands	7°02'04.66" N 93°47'02.94" E
ZSI	19671	Tupaia belangeri assammensis	Tupaia belangeri belangeri	Arunachal Pradesh			170	140	17	42	Borpani, Dikrang, Arunachal Pradesh	27°06'14.68" N 93°49'54.11" E
ZSI	19670	Tupaia belangeri assammensis	Tupaia belangeri belangeri	Assam		M	180	170	15	39	Jamduar, Assam	26°14'47.16" N 90°16'46.61" E
ZSI	7231	Anathana ellioti ellioti	Anathana ellioti	Tamil Nadu		F	165	175	16.5	43	No locality details available
ZSI	19756	Anathana ellioti ellioti	Anathana ellioti	Tamil Nadu	1851	N	178	185	15	41	No locality details available
ZSI	7171	Anathana ellioti ellioti	Anathana ellioti				162	175	16	39.19	No locality details available
ZSI	16294	Anathana ellioti pallida	Anathana ellioti	Odisha	6.10.1921	F	168	174	17	41	No locality details available
ZSI	202F	Anathana ellioti pallida	Anathana ellioti		1874	F	192	175	15	38	No locality details available
ZSI	202E	Anathana ellioti pallida	Anathana ellioti		1874	M	189	195	16	39.82	No locality details available
ZSI	202D	Anathana ellioti pallida	Anathana ellioti		1874	M	180	195	16.52	39.73	No locality details available
ZSI	19685	Tupaia belangeri assammensis	Tupaia belangeri belangeri			F	160.5	150	11.7	35.8	No locality details available
ZSI	R2/14	Tupaia belangeri assammensis	Tupaia belangeri belangeri			M	170.2	152	15.5	37	No locality details available
ZSI	18865	Tupaia belangeri assammensis	Tupaia belangeri belangeri			M	170	162	16	41	No locality details available
ZSI	19686	Tupaia belangeri assammensis	Tupaia belangeri belangeri			M	176	140	17	42	No locality details available
ZSI	19685	Tupaia belangeri assammensis	Tupaia belangeri belangeri			F	177	164	16.5	40	No locality details available
ZSI	16629	Tupaia belangeri brunetta	Tupaia belangeri belangeri			F	178	148	22	40	No locality details available
ZSI	16633	Tupaia belangeri brunetta	Tupaia belangeri belangeri			M	173	150	16	40	No locality details available
ZSI	16632	Tupaia belangeri brunetta	Tupaia belangeri belangeri			F	162	150	16	39	No locality details available
ZSI	5247	Tupaia belangeri clarissa	Tupaia belangeri belangeri		21.4.1882	M	178	165	15	41	No locality details available
ZSI	16622	Tupaia belangeri siccata	Tupaia belangeri belangeri			M	171	158	17	42	No locality details available
ZSI	16619	Tupaia belangeri siccata	Tupaia belangeri belangeri			M	153	165	15.5	42	No locality details available
ZSI	16618	Tupaia belangeri siccata	Tupaia belangeri belangeri			F	160	150.5	16	37	No locality details available
